# Supplementary material for: Integrated expression profiles analysis reveals novel predictive biomarker in pancreatic ductal adenocarcinoma
Source: PubMed Central journal article supplement (PMC5581051; doi:10.18632/oncotarget.16732), 2017-03-31
Supplement: oncotarget-08-52571-s001.pdf [file oncotarget-08-52571-s001.pdf]

## Integrated expression profiles analysis reveals novel predictive biomarker in pancreatic ductal adenocarcinoma

### SUPPLEMENTARY MATERIALS

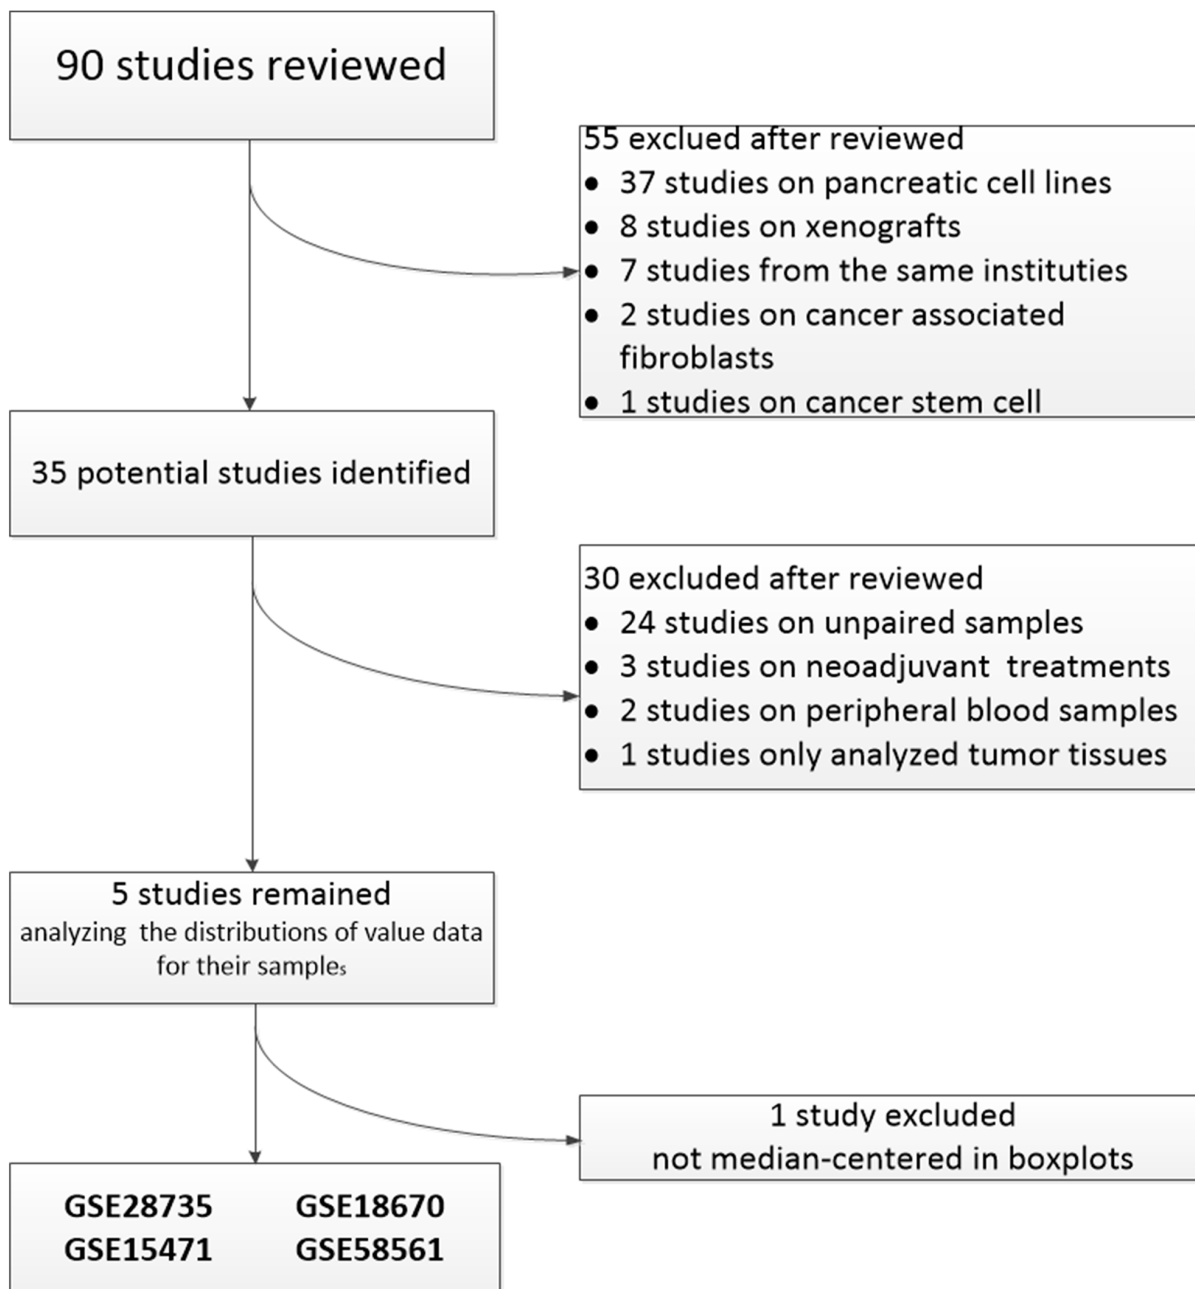

Supplementary Figure 1: Selection of eligible studies following exclusion criteria mentioned in Methods.

Supplementary Table 1: Primers used for qRT-PCR assay in this article.

See Supplementary File
